# Supplementary material
Source: PubMed Central journal article supplement (PMC4144664)

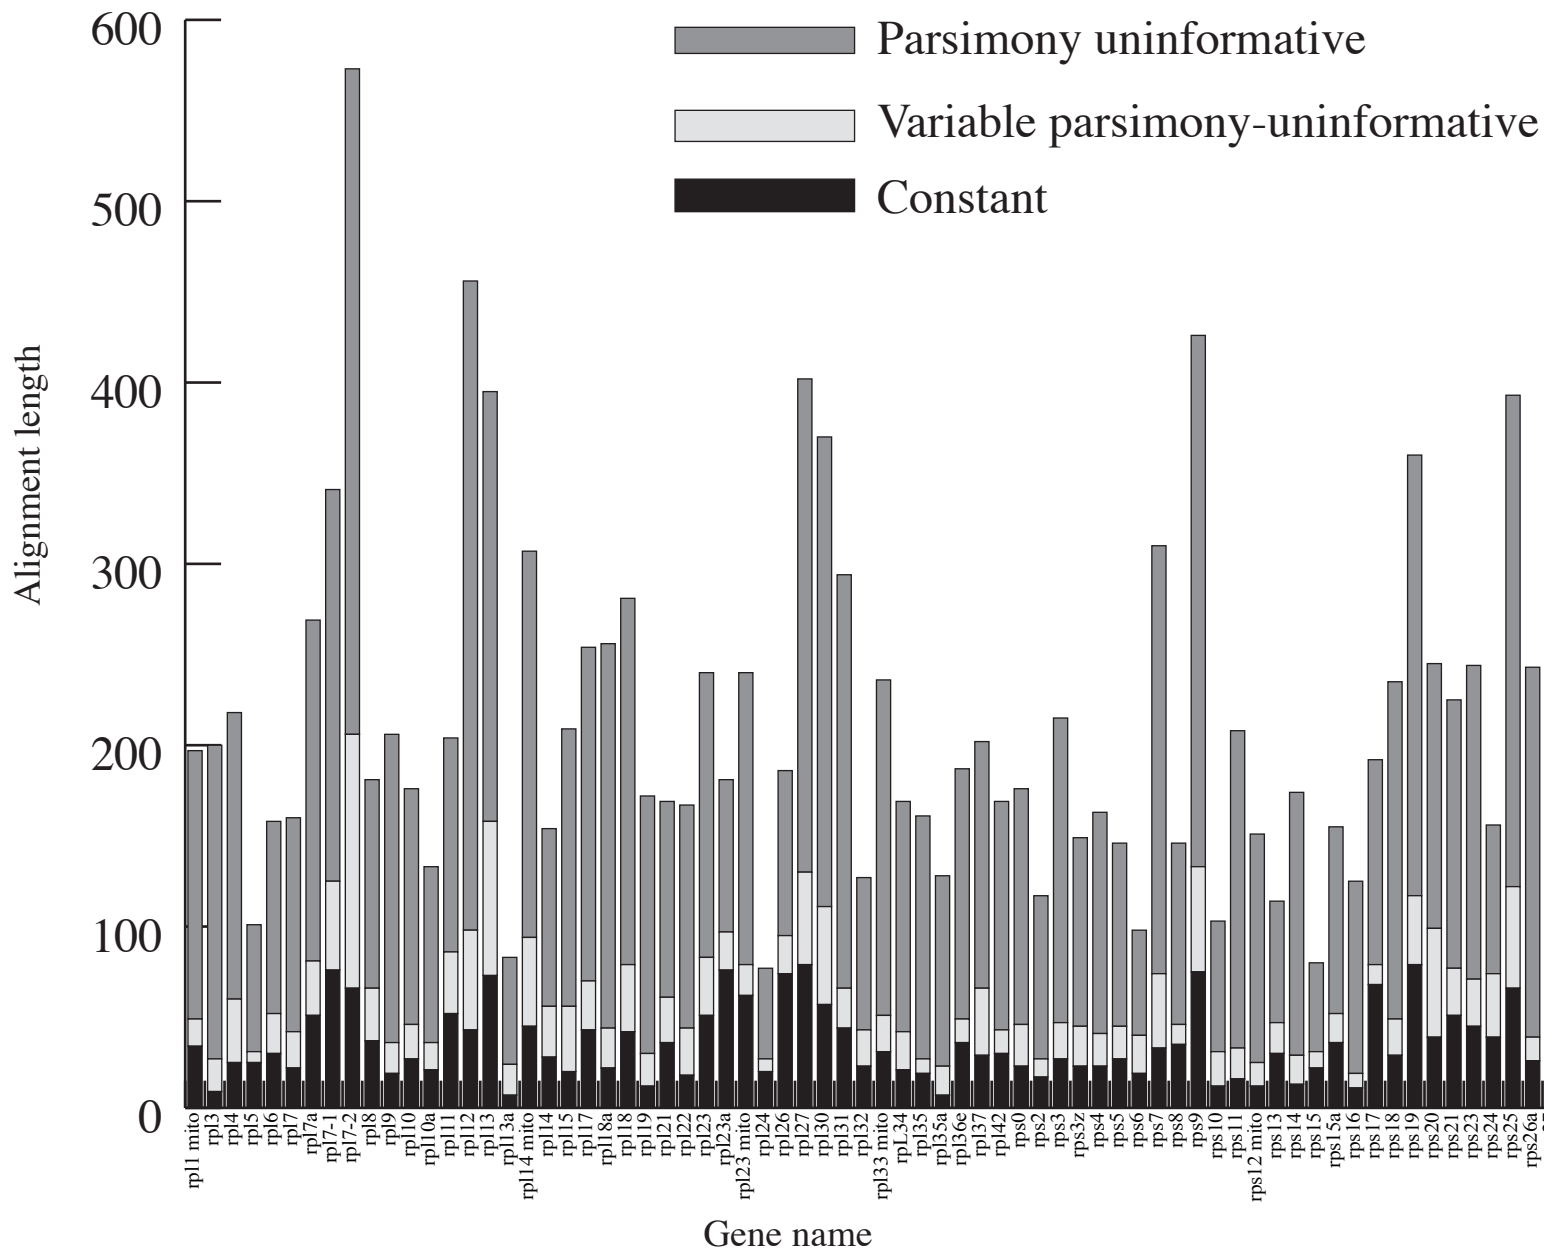

Supplement: NIHMS616107-supplement-supplemental_figure.pdf [file NIHMS616107-supplement-supplemental_figure.pdf]
